# Supplementary material
Source: ML conference proceedings conference paper supplement (https://openaccess.thecvf.com/content/CVPR2026/html/Qian_pH-Strips_for_Selective_CVPR_2026_paper.html)
Supplement: Supplementary file 1 [file Qian_pH-Strips_for_Selective_CVPR_2026_supplemental.pdf]

# pH-Strips for Selective Forgetting: A Blunt but Fast Diagnostic Baseline for Machine Unlearning Supplementary Material

## A. Pseudo Code

Algorithm 1 shows the pseudo code for the proposed method.

---

**Algorithm 1** Pseudo code of our proposed method.

---

**Require:** A trained model  $g(\mathbf{x}; \boldsymbol{\theta}, i)$  output the inputs feature of  $i$ -th layer, Forgetting dataset  $\mathcal{D}_f = \{(\mathbf{x}_i, y_i)\}_{i=1}^{m_f}$ ,  $\{i_1, i_2, \dots, i_z\}$  selected  $z$  layers for updating the weight, The first  $n$  left-singular vectors used to update the weight.

**for**  $i \in \{i_1, i_2, \dots, i_z\}$  **do**

$\mathbf{X}_i \leftarrow g(\mathbf{x}; \boldsymbol{\theta}, i), \mathbf{x} \in \mathcal{D}_f$      $\triangleright$  Collect features from forgetting dataset. The features are the input for the layer will be updated.

$\mathbf{W}_i \leftarrow \boldsymbol{\theta}_i$      $\triangleright$  Collect the weight from the selected layer

$\mathbf{U}, \mathbf{S}, \mathbf{V}^\top \leftarrow \text{SVD}(\mathbf{X}_i), \mathbf{X}_i \in \mathbb{R}^{d \times m_f}$      $\triangleright$  Calculate the left-singular vectors by SVD decomposition or by Equation (16)

$\mathbf{W}_i^{\text{unlearning}} \leftarrow \mathbf{W}_i - \mathbf{W}_i \mathbf{U}_{:, :k} \mathbf{U}_{:, :k}^\top$

$\boldsymbol{\theta}_i \leftarrow \mathbf{W}_i^{\text{unlearning}}$      $\triangleright$  Update the weight of layer

**end for**

---

**Erasure in attention layers.** Attention blocks apply linear projections to produce queries, keys, and values, so MUpHT extends naturally to them. Let  $\mathbf{X}_f \in \mathbb{R}^{d \times n_f}$  denote the token features of  $n_f$  forget samples at a given attention layer. The corresponding query, key, and value features are

$$\mathbf{Q}_f = \mathbf{W}_q \mathbf{X}_f, \quad \mathbf{K}_f = \mathbf{W}_k \mathbf{X}_f, \quad \mathbf{V}_f = \mathbf{W}_v \mathbf{X}_f, \quad (17)$$

with  $\mathbf{W}_q, \mathbf{W}_k, \mathbf{W}_v \in \mathbb{R}^{d \times d}$ . For each of these, we extract a forgetting subspace via SVD as:

$$\mathbf{Q}_f = \mathbf{U}_q \boldsymbol{\Sigma}_q \mathbf{V}_q^\top, \quad \mathbf{K}_f = \mathbf{U}_k \boldsymbol{\Sigma}_k \mathbf{V}_k^\top, \quad \mathbf{V}_f = \mathbf{U}_v \boldsymbol{\Sigma}_v \mathbf{V}_v^\top, \quad (18)$$

we define the dominant forgetting subspaces as

$$\mathbf{U}_f^{(q)} = \mathbf{U}_{q::d_f}, \quad \mathbf{U}_f^{(k)} = \mathbf{U}_{k::d_f}, \quad \mathbf{U}_f^{(v)} = \mathbf{U}_{v::d_f}, \quad (19)$$

where  $d_f$  is the chosen subspace dimension<sup>3</sup>. MUpHT then applies the same orthogonal-complement projection used for linear layers (*i.e.*, Equation (4)), but in the appropriate representation space:

$$\mathbf{W}_q^* = \mathbf{W}_q - \mathbf{W}_q \mathbf{U}_f^{(q)} \mathbf{U}_f^{(q)\top}, \quad (20)$$

$$\mathbf{W}_k^* = \mathbf{W}_k - \mathbf{W}_k \mathbf{U}_f^{(k)} \mathbf{U}_f^{(k)\top}, \quad (21)$$

$$\mathbf{W}_v^* = \mathbf{W}_v - \mathbf{W}_v \mathbf{U}_f^{(v)} \mathbf{U}_f^{(v)\top}. \quad (22)$$

This removes the principal directions along which forget samples vary in the query, key, and value spaces. Since attention scores depend on  $\mathbf{Q}^\top \mathbf{K}$  and outputs are formed from  $\mathbf{V}$ , suppressing these directions makes the attention mechanism effectively blind to the forgotten concept while leaving directions unrelated to it largely intact. Multi-head attention is handled by applying the procedure independently to each head.

---

<sup>3</sup>We propose to use the same dimensionality to minimize hyperparameter tuning in MUpHT.

**Erase in Convolution.** While convolutional layers operate differently from fully connected layers, their operations can be reformulated as matrix multiplications, allowing the proposed unlearning method for fully connected layers to be applied to convolutional layers. Consider an input feature vector  $\mathbf{X} \in \mathbb{R}^{d \times h \times w}$ , where  $h$  and  $w$  are the height and width of the feature map, respectively. The convolutional layer has weights  $\mathbf{W} \in \mathbb{R}^{d_{\text{out}} \times d \times k \times k}$ , where  $d_{\text{out}}$  is the number of output channels and  $k$  is the kernel size. To convert the convolutional operation into matrix multiplication, we first extract  $k \times k$  patches from the input feature map into  $\mathbf{X}_{\text{cov}} \in \mathbb{R}^{d \times k \times k \times (h-k+1) \times (w-k+1)}$  as follows:

$$\mathbf{X}_{:::,i:,i,j}^{\text{cov}} = \mathbf{X}_{:,i:i+k,j:j+k}. \quad (23)$$

Here, we assume a stride of 1. Next, we reshape the weight and feature matrices as  $\mathbf{W} \in \mathbb{R}^{d_{\text{out}} \times (d \times k^2)}$  and  $\mathbf{X}_{\text{cov}} \in \mathbb{R}^{(d \times k^2) \times ((h-k+1) \times (w-k+1))}$ . The convolutional operation can then be expressed as matrix multiplication:

$$\mathbf{W} * \mathbf{X} = \mathbf{W} \mathbf{X}^{\text{cov}}, \quad (24)$$

where  $*$  represents the convolution operation. After converting the convolution operation to matrix multiplication, we apply SVD decomposition on the feature matrix  $\mathbf{X}^{\text{cov}} \in \mathbb{R}^{(d_{\text{in}} \times k^2) \times ((h-k+1) \times (w-k+1) \times b)}$  and update the weights using Equation (4). Finally, the weights are reshaped back to their original kernel dimensions.

## B. Related Work

**Gram-Schmidt Process.** The Gram-Schmidt process, named after Jørgen Pedersen Gram and Erhard Schmidt, is a method used to compute an orthonormal basis from a set of vectors in an inner product space Kenneth [19]. Given a non-orthogonal set of vectors  $\{\mathbf{v}_1, \mathbf{v}_2, \dots, \mathbf{v}_m\}$ , where each  $\mathbf{v}_i \in \mathbb{R}^d$  and  $m \leq d$ , the purpose of the Gram-Schmidt process is to generate an orthonormal set  $\{\mathbf{u}_1, \mathbf{u}_2, \dots, \mathbf{u}_m\}$  that spans the same  $m$ -dimensional subspace of  $\mathbb{R}^d$  as the original set:  $\text{Span}\{\mathbf{u}_1, \dots, \mathbf{u}_m\} = \text{Span}\{\mathbf{v}_1, \dots, \mathbf{v}_m\}$ . where Span denotes the space spanned by the corresponding vectors. The Gram-Schmidt process is defined by the following:

$$\mathbf{u}_k = \frac{\mathbf{v}_k - \sum_{j=1}^{k-1} \langle \mathbf{v}_k, \mathbf{u}_j \rangle \mathbf{u}_j}{\|\mathbf{v}_k - \sum_{j=1}^{k-1} \langle \mathbf{v}_k, \mathbf{u}_j \rangle \mathbf{u}_j\|}, \text{ where } (k = 2, 3, \dots). \quad (25)$$

The first vector  $\mathbf{u}_1 = \mathbf{v}_1 / \|\mathbf{v}_1\|$ .  $\langle \mathbf{v}_k, \mathbf{u}_j \rangle$  denotes the inner product between vectors  $\mathbf{v}_k$  and  $\mathbf{u}_j$ , and  $\|\cdot\|$  represents the Frobenius norm.

## C. Ablation Studies

### C.1. Comparison on a Few Samples

In this section, the comparison of different numbers of samples used in the proposed method is shown in the Table 6. Even with only one sample, the proposed method can forget the corresponding class efficiently. Using the full 450 samples achieves perfect unlearning (UA = 100.00) with a marginal increase in runtime (RTE = 0.22 sec). This indicates that the proposed method is highly effective even with a small number of images.

Table 6. Ablation results for class-wise forgetting with ResNet18 on CIFAR-100. ‘ $N$ -shot’: numbers of images from  $\mathcal{D}_f$  used for unlearning. ‘# of principal vectors’: number of left-singular vectors used in ours. Each class in CIFAR-10 contains 450 samples.

| $N$ -shot | #   | UA $\uparrow$ | RA $\uparrow$ | TA $\uparrow$ | MIA $\uparrow$ | RTE (min.) $\downarrow$ |
|-----------|-----|---------------|---------------|---------------|----------------|-------------------------|
| 1         | 1   | 87.12         | 97.41         | 75.19         | 100.00         | 0.0027                  |
|           | 1   | 97.12         | 97.43         | 75.10         | 100.00         | 0.0027                  |
|           | 5   | 97.78         | 97.41         | 75.04         | 100.00         | 0.0027                  |
| 5         | 5   | 98.67         | 97.35         | 74.78         | 100.00         | 0.0027                  |
|           | 1   | 99.56         | 97.43         | 75.52         | 100.00         | 0.0037                  |
|           | 450 | 99.12         | 97.41         | 75.08         | 100.00         | 0.0037                  |
| 450       | 5   | 100.00        | 97.29         | 74.36         | 100.00         | 0.0037                  |

## C.2. Unlearning with External Samples

In our experiments, the samples used are drawn from the training dataset following the setting of prior work [8]. We evaluated our method using external examples using ResNet18 on CIFAR-10. To unlearn the concept of “airplane”, we used airliner images from ImageNet as forget images (see Table 7 below). Our method excels in unlearning even with external forget samples.

Table 7. Ablation study for using external images.

| Sample   | UA↑   | RA↑   | TA↑   | MIA↑   |
|----------|-------|-------|-------|--------|
| internal | 99.19 | 99.46 | 94.79 | 100.00 |
| external | 98.32 | 99.45 | 94.79 | 100.00 |

## C.3. Layer Selection

We show the ablation study about layer selection of VGG16 on CIFAR-100 in Table 8.

Table 8. Ablation study for layer selection.

| Layer | UA↑   | RA↑   | TA↑   | MIA↑   | RTE (min.)↓ |
|-------|-------|-------|-------|--------|-------------|
| 16    | 98.21 | 96.39 | 69.67 | 100.00 | 0.004       |
| 14    | 99.11 | 95.04 | 69.04 | 100.00 | 0.028       |
| 10    | 94.83 | 96.64 | 70.31 | 99.78  | 0.030       |
| 8     | 85.26 | 93.72 | 65.25 | 92.65  | 0.038       |

## C.4. Trade-off Curves

Figure 5 reports UA vs RA/TA trade-off curves. A scalar  $\alpha \in \mathbb{R}$  is introduced in the closed-form update  $\mathbf{W}^{\text{unlearning}} = \mathbf{W} - \alpha \mathbf{W} \mathbf{U}_f \mathbf{U}_f^T$ , which scales the strength of the same projection without introducing training or additional data. Optimization-based methods such as SalUn perform well in low-UA regimes, where partial forgetting is sufficient. However, as the target shifts toward near-complete unlearning ( $\text{UA} \rightarrow 100\%$ ), SalUn exhibits a sharp degradation in both RA and TA. In contrast, MUpHT maintains stable RA and TA in this regime. This comparison reflects fundamentally different operating assumptions: fine-tuning-based methods rely on iterative optimization, while MUpHT remains training-free and retain-set-free. The purpose of these curves is therefore not to claim Pareto dominance, but to show that when strong unlearning is feasible at all, MUpHT provides a fast and reliable diagnostic signal.

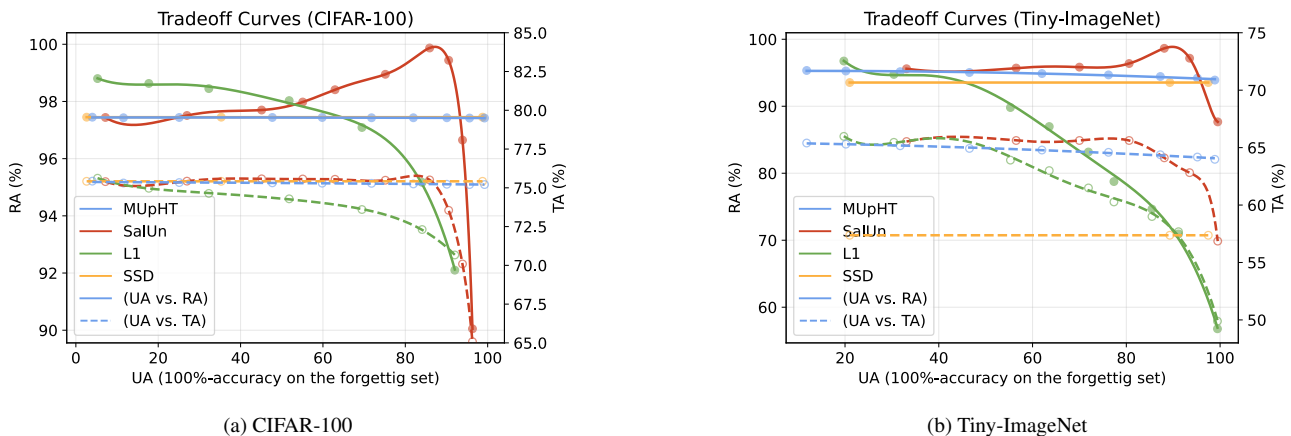

Figure 5. Results on CIFAR-100 (left) & Tiny-ImageNet (right).

## D. More Experiments

We further evaluate our method for multi-class unlearning on CIFAR-100, unlearning on CLIP, and unlearning on large dataset Tiny ImageNet.

### D.1. Instance-wise forgetting

Table 9 presents instance-wise forgetting results. Because the forgetting and remaining features are highly entangled at the instance-wise forgetting, we apply only MUpHT<sup>†</sup> in this setting.

Table 9. Results of 10% random forgetting on ResNet18 trained on CIFAR-10. The results are given by  $a \pm b$ , where a is the mean and b is the standard deviation calculated over 10 independent trials.

| Methods            | UA $\uparrow$   | RA $\uparrow$    | TA $\uparrow$    | MIA $\uparrow$    | Avg.Gap $\downarrow$ | RTE (Mins) $\downarrow$ |
|--------------------|-----------------|------------------|------------------|-------------------|----------------------|-------------------------|
| Retrain            | 5.24 $\pm$ 0.69 | 100 $\pm$ 0.00   | 94.26 $\pm$ 0.02 | 12.88 $\pm$ 0.09  | 0.00                 | 44.56                   |
| FT                 | 0.63 $\pm$ 4.61 | 99.88 $\pm$ 0.12 | 94.06 $\pm$ 0.20 | 2.70 $\pm$ 10.19  | 3.78                 | 2.45                    |
| RL                 | 7.61 $\pm$ 2.37 | 99.67 $\pm$ 0.33 | 92.83 $\pm$ 1.43 | 37.36 $\pm$ 24.47 | 7.15                 | 2.73                    |
| GA                 | 0.69 $\pm$ 4.56 | 99.50 $\pm$ 0.50 | 94.01 $\pm$ 0.25 | 1.70 $\pm$ 11.18  | 4.12                 | 0.15                    |
| IU                 | 1.07 $\pm$ 4.17 | 99.20 $\pm$ 0.80 | 93.20 $\pm$ 1.06 | 2.67 $\pm$ 10.21  | 4.06                 | 0.39                    |
| BE                 | 0.59 $\pm$ 4.65 | 99.42 $\pm$ 0.58 | 93.85 $\pm$ 0.42 | 7.47 $\pm$ 5.41   | 2.76                 | 0.27                    |
| BS                 | 1.78 $\pm$ 3.47 | 98.29 $\pm$ 1.71 | 92.69 $\pm$ 1.57 | 8.96 $\pm$ 3.93   | 2.67                 | 0.45                    |
| $\ell_1$ -sparse   | 4.19 $\pm$ 1.06 | 97.74 $\pm$ 2.26 | 91.59 $\pm$ 2.67 | 9.84 $\pm$ 3.04   | 2.26                 | 2.48                    |
| SalUn              | 2.85 $\pm$ 2.39 | 99.62 $\pm$ 0.38 | 93.93 $\pm$ 0.33 | 14.39 $\pm$ 1.51  | 1.15                 | 2.74                    |
| MUpHT <sup>†</sup> | 1.49 $\pm$ 0.12 | 98.89 $\pm$ 0.44 | 92.76 $\pm$ 0.23 | 7.87 $\pm$ 0.11   | 2.84                 | 0.42                    |

### D.2. Multi-Class Unlearning on CIFAR-100

In the case of CIFAR-100, we conduct unlearning on multiple classes by unlearning each set of ten classes at a time. The results presented in Table 10 demonstrate that our method consistently achieves SOTA performance.

Table 10. Results of multi-class forgetting on CIFAR-100 for ResNet18. RTE is measured in minutes.

| Methods          | UA $\uparrow$     | RA $\uparrow$     | TA $\uparrow$    | MIA $\uparrow$    | Avg.Gap $\downarrow$ | RTE $\downarrow$ |
|------------------|-------------------|-------------------|------------------|-------------------|----------------------|------------------|
| Original         | 2.49              | 97.45             | 75.41            | 5.75              | -                    | -                |
| Retrain          | 99.98             | 100.00            | 69.48            | 100.00            | -                    | 36.73            |
| FT               | 98.17 $\pm$ 0.85  | 95.35 $\pm$ 1.05  | 63.17 $\pm$ 1.28 | 99.92 $\pm$ 0.11  | 3.21                 | 2.30             |
| GA               | 86.86 $\pm$ 5.11  | 91.19 $\pm$ 4.03  | 62.25 $\pm$ 3.18 | 96.17 $\pm$ 1.59  | 7.30                 | 0.15             |
| IU               | 82.59 $\pm$ 9.90  | 64.90 $\pm$ 14.49 | 46.32 $\pm$ 8.85 | 83.00 $\pm$ 6.88  | 23.16                | 0.29             |
| BE               | 97.23 $\pm$ 2.90  | 89.89 $\pm$ 2.23  | 54.07 $\pm$ 2.05 | 98.15 $\pm$ 2.78  | 7.52                 | 0.28             |
| BS               | 94.35 $\pm$ 3.22  | 85.50 $\pm$ 2.89  | 53.70 $\pm$ 1.81 | 96.69 $\pm$ 3.30  | 9.80                 | 0.45             |
| $\ell_1$ -sparse | 99.98 $\pm$ 0.04  | 88.75 $\pm$ 1.32  | 60.98 $\pm$ 0.89 | 100.00 $\pm$ 0.00 | 4.94                 | 2.34             |
| SalUn            | 96.31 $\pm$ 9.16  | 99.75 $\pm$ 0.15  | 67.65 $\pm$ 0.89 | 100.00 $\pm$ 0.00 | 1.43                 | 2.61             |
| SSD              | 100.00 $\pm$ 0.00 | 97.58 $\pm$ 0.04  | 68.35 $\pm$ 0.35 | 100.00 $\pm$ 0.00 | 0.87                 | 0.19             |
| GF               | 64.86 $\pm$ 9.72  | 89.18 $\pm$ 1.97  | 63.93 $\pm$ 1.83 | 58.49 $\pm$ 8.73  | 23.25                | 0.40             |
| MUpHT            | 100.00 $\pm$ 0.01 | 97.47 $\pm$ 0.04  | 68.88 $\pm$ 0.32 | 100.00 $\pm$ 0.00 | <b>0.77</b>          | <b>0.03</b>      |

### D.3. Erasing in CLIP

In this experiment, we evaluate MU methods with the large-scale vision-language model CLIP [36] in Table 11. The pre-trained CLIP model trained on the dataset LAION-2B [40] is employed. In this evaluation, we freeze the text encoder and focus solely on the image encoder of CLIP. Note that the remaining accuracy and testing accuracy of FT and  $\ell_1$ -sparse

methods are better than those of the original models, this is because these methods involve additional training on the remaining data, while the results of the proposed method are close to those of the original models.

Table 11. Results of class-wise forgetting with CLIP on Oxford Pets dataset [33].

| Method           | UA $\uparrow$ | RA $\uparrow$ | TA $\uparrow$ | RTE (min.) $\downarrow$ |
|------------------|---------------|---------------|---------------|-------------------------|
| Original         | 26.61         | 72.02         | 72.42         | -                       |
| FT               | 54.31         | <b>95.29</b>  | <b>90.96</b>  | 1.89                    |
| GA               | 33.44         | 71.64         | 72.26         | 0.18                    |
| $\ell_1$ -sparse | 55.21         | 95.11         | 90.91         | 1.72                    |
| MUpHT            | <b>65.01</b>  | 69.90         | 69.00         | <b>0.05</b>             |

#### D.4. Performance on larger datasets

We also explore the applicability of our method on the larger Tiny ImageNet dataset shown in Table 12. Our method outperforms existing method with 1 second.

#### D.5. Various models on CIFAR-10, CIFAR100 and SVHN

Table 14 shows the results of class-wise forgetting for ResNet18 on various datasets, Table 15 shows the results of class-wise forgetting for ResNet50 on various datasets, and Table 16 presents the results for VGG16 on the same datasets. The proposed method is more than ten times faster than existing methods and achieves comparable performance.

Sample-wise unlearning, also known as random forgetting, is one of the most challenging tasks in MU. Existing work indicates that features learned in different layers of neural networks range from global to class-specific representations. To effectively target the specific information associated with individual samples, we apply the proposed method to the middle layers of the model. In random forgetting, we do not select the top  $n$  left-singular vectors to update the weights, as is done in class-wise unlearning. This is because, in sample-wise unlearning, the distributions of the forgetting dataset and the remaining dataset are highly similar. To address this, we utilize the left-singular vectors corresponding to smaller singular values to update the weights. We employ a threshold  $\beta$  on the singular values to select these vectors which are less than  $\beta$ . Table 9 shows the results of 10% random forgetting on ResNet18 trained on CIFAR-10. Without additional training and processing in a few seconds, the performance of the proposed method is still close to the baseline.

#### E. More Visualization

Figure 6 shows more generative results of class-wise forgetting for Stable Diffusion on the Imagenette dataset. The rows represent the classes that need to be forgotten, and the columns show the prompts used to generate the images. Please see the Appendix in the supplementary material.

Table 12. Results of class-wise on Tiny ImageNet for ResNet18. RTE is measured in minutes.

| Methods          | UA $\uparrow$     | RA $\uparrow$     | TA $\uparrow$     | MIA $\uparrow$    | Avg.Gap $\downarrow$ | RTE $\downarrow$ |
|------------------|-------------------|-------------------|-------------------|-------------------|----------------------|------------------|
| Original         | 3.84              | 95.39             | 65.69             | 10.34             | -                    | -                |
| Retrain          | 99.98             | 100.00            | 65.41             | 100.00            | -                    | 209.45           |
| FT               | 97.06 $\pm$ 4.41  | 97.76 $\pm$ 0.13  | 61.25 $\pm$ 0.22  | 99.56 $\pm$ 0.66  | <b>2.44</b>          | 12.93            |
| GA               | 97.96 $\pm$ 1.73  | 87.91 $\pm$ 2.22  | 58.93 $\pm$ 1.47  | 98.06 $\pm$ 1.48  | 5.15                 | 0.05             |
| IU               | 90.30 $\pm$ 17.27 | 77.83 $\pm$ 17.83 | 53.58 $\pm$ 11.25 | 83.06 $\pm$ 31.99 | 15.15                | 1.34             |
| BE               | 98.04 $\pm$ 1.06  | 80.23 $\pm$ 5.21  | 53.87 $\pm$ 3.46  | 98.06 $\pm$ 1.35  | 8.79                 | 0.08             |
| BS               | 98.02 $\pm$ 1.07  | 80.24 $\pm$ 5.21  | 53.87 $\pm$ 3.45  | 98.06 $\pm$ 1.42  | 8.80                 | 0.15             |
| $\ell_1$ -sparse | 99.14 $\pm$ 1.78  | 92.71 $\pm$ 0.56  | 58.66 $\pm$ 0.57  | 99.90 $\pm$ 0.40  | 3.77                 | 13.02            |
| SalUn            | 93.66 $\pm$ 4.36  | 97.50 $\pm$ 0.30  | 62.63 $\pm$ 0.27  | 100.00 $\pm$ 0.00 | 2.90                 | 13.01            |
| SSD              | 97.48 $\pm$ 0.93  | 93.54 $\pm$ 4.75  | 57.37 $\pm$ 3.56  | 98.18 $\pm$ 1.38  | 4.01                 | 0.81             |
| MUpHT            | 99.98 $\pm$ 0.06  | 92.12 $\pm$ 0.51  | 62.96 $\pm$ 0.47  | 100.00 $\pm$ 0.00 | 2.58                 | <b>0.02</b>      |

Table 13. Results of class-wise forgetting on Swin-T trained on CIFAR-10. The results are given by  $a_{\pm b}$ , where a is the mean and b is the standard deviation calculated over all classes. Note that our method is training-free.

| Methods          | UA $\uparrow$     | RA $\uparrow$     | TA $\uparrow$     | MIA $\uparrow$    | Avg.Gap $\downarrow$ | RTE (min.) $\downarrow$ |
|------------------|-------------------|-------------------|-------------------|-------------------|----------------------|-------------------------|
| Retrain          | 100.00            | 95.41             | 80.85             | 100.00            | -                    | 62.69                   |
| FT               | 92.56 $\pm$ 7.28  | 89.66 $\pm$ 0.98  | 79.28 $\pm$ 1.34  | 95.18 $\pm$ 5.73  | 4.90                 | 4.10                    |
| IU               | 74.64 $\pm$ 24.20 | 70.36 $\pm$ 29.11 | 60.86 $\pm$ 23.68 | 69.95 $\pm$ 31.08 | 25.11                | 1.19                    |
| BE               | 98.35 $\pm$ 0.84  | 79.71 $\pm$ 4.82  | 61.35 $\pm$ 3.62  | 98.16 $\pm$ 0.10  | 8.05                 | 0.44                    |
| BS               | 97.99 $\pm$ 5.12  | 83.07 $\pm$ 6.76  | 65.21 $\pm$ 5.05  | 99.01 $\pm$ 2.00  | 6.10                 | 0.87                    |
| $\ell_1$ -sparse | 96.30 $\pm$ 5.16  | 87.88 $\pm$ 1.18  | 78.66 $\pm$ 1.58  | 97.57 $\pm$ 4.19  | 3.96                 | 4.17                    |
| SalUn            | 99.99 $\pm$ 0.03  | 94.51 $\pm$ 0.44  | 81.44 $\pm$ 1.27  | 100.00 $\pm$ 0.00 | 0.37                 | 4.41                    |
| SSD              | 98.17 $\pm$ 2.43  | 88.35 $\pm$ 5.10  | 76.32 $\pm$ 3.55  | 99.56 $\pm$ 0.75  | 3.46                 | 0.51                    |
| GF               | 94.14 $\pm$ 5.85  | 83.93 $\pm$ 17.17 | 64.42 $\pm$ 13.09 | 95.17 $\pm$ 3.71  | 9.65                 | 1.24                    |
| MUpHT            | 99.93 $\pm$ 0.10  | 96.06 $\pm$ 0.30  | 80.65 $\pm$ 1.01  | 100.00 $\pm$ 0.00 | <b>0.23</b>          | <b>0.01</b>             |

Table 14. Results of class-wise forgetting on ResNet18.

| Dataset          | Methods          | UA $\uparrow$     | RA $\uparrow$     | TA $\uparrow$     | MIA $\uparrow$    | Avg.Gap $\downarrow$ | RTE (min.) $\downarrow$ |       |
|------------------|------------------|-------------------|-------------------|-------------------|-------------------|----------------------|-------------------------|-------|
| CIFAR-10         | Retrain          | 100.00            | 100.00            | 94.69             | 100.00            | -                    | 35.65                   |       |
|                  | FT               | 100.00 $\pm$ 0.00 | 90.43 $\pm$ 2.47  | 86.36 $\pm$ 2.32  | 100.00 $\pm$ 0.00 | 4.47                 | 2.29                    |       |
|                  | GA               | 93.63 $\pm$ 1.54  | 94.21 $\pm$ 1.91  | 88.43 $\pm$ 01.94 | 96.38 $\pm$ 1.93  | 5.51                 | 0.14                    |       |
|                  | IU               | 91.63 $\pm$ 12.20 | 84.77 $\pm$ 24.73 | 79.79 $\pm$ 22.97 | 85.14 $\pm$ 7.51  | 13.33                | 0.39                    |       |
|                  | BE               | 83.57 $\pm$ 4.10  | 98.44 $\pm$ 0.47  | 92.62 $\pm$ 1.06  | 99.26 $\pm$ 0.70  | 5.19                 | 0.28                    |       |
|                  | BS               | 85.24 $\pm$ 11.48 | 98.03 $\pm$ 1.03  | 92.21 $\pm$ 1.69  | 98.72 $\pm$ 1.13  | 5.12                 | 0.50                    |       |
|                  | $\ell_1$ -sparse | 100.00 $\pm$ 0.00 | 97.49 $\pm$ 0.54  | 91.79 $\pm$ 0.88  | 100.00 $\pm$ 0.00 | 1.35                 | 2.36                    |       |
|                  | SalUn            | 99.95 $\pm$ 0.15  | 99.78 $\pm$ 0.09  | 94.37 $\pm$ 0.68  | 100.00 $\pm$ 0.00 | <b>0.15</b>          | 2.45                    |       |
|                  | SSD              | 100.00 $\pm$ 0.00 | 98.21 $\pm$ 1.85  | 92.84 $\pm$ 1.98  | 100.00 $\pm$ 0.00 | 0.91                 | 0.21                    |       |
|                  | GF               | 94.14 $\pm$ 8.80  | 89.25 $\pm$ 7.17  | 84.18 $\pm$ 6.68  | 98.21 $\pm$ 4.16  | 7.22                 | 0.41                    |       |
|                  | MUpHT            | 98.04 $\pm$ 0.62  | 99.47 $\pm$ 0.06  | 94.91 $\pm$ 0.60  | 100.00 $\pm$ 0.00 | 0.67                 | <b>0.01</b>             |       |
|                  | SVHN             | Retrain           | 100.00            | 100.00            | 95.97             | 100.00               | -                       | 43.16 |
|                  |                  | FT                | 100.00 $\pm$ 0.00 | 98.19 $\pm$ 0.39  | 92.46 $\pm$ 0.61  | 100.00 $\pm$ 0.00    | 1.32                    | 2.65  |
| GA               |                  | 97.56 $\pm$ 2.34  | 98.38 $\pm$ 0.91  | 93.45 $\pm$ 0.78  | 98.95 $\pm$ 2.26  | 1.90                 | 0.16                    |       |
| IU               |                  | 90.70 $\pm$ 21.34 | 98.89 $\pm$ 1.42  | 94.21 $\pm$ 1.82  | 99.96 $\pm$ 0.11  | 3.04                 | 0.44                    |       |
| BE               |                  | 98.29 $\pm$ 0.07  | 99.55 $\pm$ 0.10  | 94.92 $\pm$ 1.12  | 100.00 $\pm$ 0.00 | 0.80                 | 0.32                    |       |
| BS               |                  | 85.09 $\pm$ 11.95 | 99.36 $\pm$ 0.11  | 94.07 $\pm$ 0.66  | 91.03 $\pm$ 11.20 | 6.60                 | 0.57                    |       |
| $\ell_1$ -sparse |                  | 99.56 $\pm$ 0.00  | 99.16 $\pm$ 0.13  | 94.11 $\pm$ 0.41  | 100.00 $\pm$ 0.00 | 0.78                 | 2.69                    |       |
| SalUn            |                  | 99.93 $\pm$ 0.08  | 99.99 $\pm$ 0.00  | 95.99 $\pm$ 0.14  | 100.00 $\pm$ 0.00 | <b>0.02</b>          | 2.87                    |       |
| SSD              |                  | 100.00 $\pm$ 0.00 | 97.37 $\pm$ 4.18  | 91.90 $\pm$ 5.19  | 100.00 $\pm$ 0.00 | 1.67                 | 0.24                    |       |
| GF               |                  | 91.17 $\pm$ 19.02 | 98.51 $\pm$ 0.64  | 93.81 $\pm$ 0.86  | 100.00 $\pm$ 0.00 | 3.12                 | 0.41                    |       |
| MUpHT            |                  | 98.59 $\pm$ 0.73  | 99.43 $\pm$ 0.17  | 95.06 $\pm$ 0.51  | 100.00 $\pm$ 0.00 | 0.72                 | <b>0.01</b>             |       |

## F. Experiments Details

In this section, we provide details for the reproduction of our result. We utilize the MIA confidence score for the MIA metric. We apply our method to the last layer of models for class-wise forgetting.

The UA in Table 4 is measured by employing a default ResNet50 model to classify the images generated after unlearning. The FID is computed on images generated for both the retained concepts and the forgotten concepts

We used A5500 GPUs for the classification and multimodal tasks, and A100 GPUs for the generative task.

Table 18 provides additional experimental details, including the number of epochs and learning rates used for existing

Table 15. Results of class-wise forgetting on ResNet50.

| Dataset   | Methods          | UA $\uparrow$ | RA $\uparrow$ | TA $\uparrow$ | MIA $\uparrow$ | Avg.Gap $\downarrow$ | RTE (Mins) $\downarrow$ |
|-----------|------------------|---------------|---------------|---------------|----------------|----------------------|-------------------------|
| CIFAR-10  | Retrain          | 100.00        | 99.99         | 94.19         | 100.00         | -                    | 88.42                   |
|           | FT               | 98.82         | 97.54         | 91.86         | 100.00         | 1.48                 | 5.52                    |
|           | GA               | 95.46         | 90.54         | 85.32         | 96.55          | 6.57                 | 0.33                    |
|           | IU               | 78.52         | 91.11         | 85.86         | 84.47          | 13.55                | 1.01                    |
|           | BE               | 77.97         | 96.60         | 75.86         | 90.47          | 8.64                 | 0.63                    |
|           | BS               | 77.68         | 96.49         | 90.47         | 93.08          | 9.11                 | 1.26                    |
|           | $\ell_1$ -sparse | 100.00        | 94.91         | 90.32         | 100.00         | 2.23                 | 5.63                    |
|           | SalUn            | 100.00        | 99.15         | 93.61         | 100.00         | <b>0.35</b>          | 6.11                    |
|           | MUpHT            | 97.56         | 99.47         | 94.85         | 100.00         | 0.89                 | <b>0.02</b>             |
| CIFAR-100 | Retrain          | 100.00        | 99.93         | 74.19         | 100.00         | -                    | 97.37                   |
|           | FT               | 95.71         | 93.57         | 68.51         | 99.77          | 4.08                 | 6.11                    |
|           | GA               | 77.44         | 93.25         | 68.60         | 90/78          | 11.01                | 0.04                    |
|           | IU               | 95.75         | 75.62         | 57.03         | 98.84          | 11.72                | 0.82                    |
|           | BE               | 94.27         | 86.33         | 63.49         | 97.53          | 8.12                 | 0.08                    |
|           | BS               | 94.04         | 86.39         | 63.56         | 97.22          | 8.23                 | 0.14                    |
|           | $\ell_1$ -sparse | 98.75         | 84.73         | 64.52         | 99.71          | 6.60                 | 6.18                    |
|           | SalUn            | 87.91         | 99.74         | 75.72         | 100.00         | 3.20                 | 6.21                    |
|           | MUpHT            | 98.07         | 97.44         | 75.17         | 100.00         | <b>1.35</b>          | <b>0.004</b>            |
| SVHN      | Retrain          | 100.00        | 100.00        | 95.95         | 100.00         | -                    | 118.44                  |
|           | FT               | 100.00        | 96.94         | 93.23         | 100.00         | 1.44                 | 7.41                    |
|           | GA               | 97.39         | 98.07         | 94.24         | 98.93          | 1.56                 | 0.43                    |
|           | IU               | 86.12         | 95.32         | 91.71         | 98.42          | 6.09                 | 1.23                    |
|           | BE               | 99.99         | 98.41         | 94.08         | 100.00         | 0.87                 | 0.98                    |
|           | BS               | 90.40         | 99.42         | 95.59         | 99.85          | 2.66                 | 2.09                    |
|           | $\ell_1$ -sparse | 100.00        | 98.34         | 94.38         | 100.00         | 0.80                 | 7.60                    |
|           | SalUn            | 99.99         | 99.99         | 96.36         | 100.00         | <b>0.11</b>          | 8.21                    |
|           | MUpHT            | 97.36         | 99.40         | 95.92         | 100.00         | 0.81                 | <b>0.04</b>             |

methods. IU and  $\ell_1$ -sparse employ additional hyperparameters  $\alpha$  and  $\gamma$ , respectively. SSD needs two hyperparameters  $\lambda$  and  $\alpha$ .  $\alpha_f$  and  $\alpha_r$  for SSD. Table 17 shows the text prompts for each (Pi) used in I2P for SD to generate NSFW images.

In all our experiments, we employed the same hyperparameters for all classes when evaluating existing methods. The optimal hyperparameters for each existing method were determined through grid search to ensure the best average performance across all classes. However, it is exceedingly difficult for existing methods to find a single set of hyperparameters that performs optimally for every class. They often require careful tuning for each class across different datasets and models. To ensure fairness and consistency in our experimental setup, we introduced the same hyperparameters for different classes, but this also introduced challenges for these methods in balancing performance across the entire set of classes, as shown in Table 5. This limitation highlights the difficulty existing methods face in achieving optimal performance across all classes when constrained to a single set of hyperparameters.

In contrast, our training-free method is not dependent on hyperparameter tuning, which allows it to serve as an effective baseline for fairly evaluating new methods. This indicates that our approach provides a hyperparameter-free alternative that maintains consistent performance across different classes, datasets, and models.

Table 16. Results of class-wise forgetting on VGG16.

| Dataset   | Methods          | UA $\uparrow$ | RA $\uparrow$ | TA $\uparrow$ | MIA $\uparrow$ | Avg.Gap $\downarrow$ | RTE (Mins) $\downarrow$ |
|-----------|------------------|---------------|---------------|---------------|----------------|----------------------|-------------------------|
| CIFAR-10  | Retrain          | 100.00        | 99.99         | 93.69         | 100.00         | -                    | 27.74                   |
|           | FT               | 100.00        | 93.46         | 87.44         | 100.00         | 3.19                 | 1.74                    |
|           | GA               | 99.81         | 93.23         | 86.58         | 99.89          | 3.54                 | 0.12                    |
|           | IU               | 82.22         | 96.93         | 63.24         | 88.86          | 11.73                | 0.36                    |
|           | BE               | 98.70         | 95.54         | 87.92         | 99.80          | 2.92                 | 0.22                    |
|           | BS               | 83.59         | 92.48         | 84.93         | 87.21          | 11.37                | 0.31                    |
|           | $\ell_1$ -sparse | 99.03         | 97.17         | 90.69         | 100.00         | 1.48                 | 1.76                    |
|           | SalUn            | 100.00        | 98.19         | 91.69         | 100.00         | <b>0.95</b>          | 1.90                    |
|           | MUpHT            | 95.65         | 99.38         | 93.69         | 100.00         | 1.23                 | <b>0.015</b>            |
| CIFAR-100 | Retrain          | 100.00        | 98.64         | 69.58         | 100.00         | -                    | 30.76                   |
|           | FT               | 74.67         | 94.94         | 67.64         | 91.58          | 9.85                 | 1.89                    |
|           | GA               | 100.00        | 88.42         | 63.33         | 100.00         | 4.12                 | 0.03                    |
|           | IU               | 82.22         | 86.94         | 63.24         | 88.86          | 11.73                | 0.36                    |
|           | BE               | 88.11         | 88.39         | 63.42         | 91.69          | 9.15                 | 0.04                    |
|           | BS               | 83.11         | 89.23         | 64.01         | 88.27          | 10.90                | 0.05                    |
|           | $\ell_1$ -sparse | 80.51         | 93.90         | 67.23         | 93.34          | 8.31                 | 1.95                    |
|           | SalUn            | 81.87         | 97.56         | 68.99         | 100.00         | 4.95                 | 2.02                    |
|           | MUpHT            | 98.21         | 96.39         | 69.67         | 100.00         | <b>1.01</b>          | <b>0.004</b>            |
| SVHN      | Retrain          | 100.00        | 100.00        | 95.83         | 100.00         | -                    | 28.77                   |
|           | FT               | 100.00        | 97.83         | 93.30         | 100.00         | 1.17                 | 1.80                    |
|           | GA               | 100.00        | 77.66         | 74.89         | 80.00          | 15.82                | 0.11                    |
|           | IU               | 96.62         | 91.54         | 87.22         | 99.93          | 5.13                 | 0.33                    |
|           | BE               | 99.92         | 99.51         | 95.21         | 100.00         | 0.30                 | 0.30                    |
|           | BS               | 81.42         | 98.95         | 93.89         | 86.65          | 8.73                 | 0.37                    |
|           | $\ell_1$ -sparse | 100.00        | 98.92         | 94.08         | 100.00         | 0.71                 | 1.89                    |
|           | SalUn            | 100.00        | 99.98         | 95.95         | 100.00         | <b>0.03</b>          | 1.97                    |
|           | MUpHT            | 100.00        | 97.36         | 93.28         | 100.00         | 1.29                 | <b>0.019</b>            |

| Unlearned class  | Prompts class                                                                       |                                                                                     |                                                                                     |                                                                                     |                                                                                     |                                                                                      |                                                                                       |                                                                                       |                                                                                       |                                                                                       |
|------------------|-------------------------------------------------------------------------------------|-------------------------------------------------------------------------------------|-------------------------------------------------------------------------------------|-------------------------------------------------------------------------------------|-------------------------------------------------------------------------------------|--------------------------------------------------------------------------------------|---------------------------------------------------------------------------------------|---------------------------------------------------------------------------------------|---------------------------------------------------------------------------------------|---------------------------------------------------------------------------------------|
|                  | Tench                                                                               | English springer                                                                    | Cassette player                                                                     | Chain saw                                                                           | Church                                                                              | French horn                                                                          | Garbage truck                                                                         | Gas pump                                                                              | Golf ball                                                                             | Parachute                                                                             |
| Tench            |    |    |    |    |    |    |    |    |    |    |
| English springer |    |    |    |    |    |    |    |    |    |    |
| Cassette player  |    |    |    |    |    |    |    |    |    |    |
| Chain saw        |    |    |    |    |    |    |    |    |    |    |
| Church           |   |   |   |   |   |   |   |   |   |   |
| French horn      |  |  |  |  |  |  |  |  |  |  |
| Garbage truck    |  |  |  |  |  |  |  |  |  |  |
| Gas pump         |  |  |  |  |  |  |  |  |  |  |
| Golf ball        |  |  |  |  |  |  |  |  |  |  |
| Parachute        |  |  |  |  |  |  |  |  |  |  |

Figure 6. Visualization of generated images by SD for class-wise forgetting on Imagenette.

Table 17. Text prompts in I2P for SD

|     |                                                                                                                                                                                                                                                                                                                                                                  |
|-----|------------------------------------------------------------------------------------------------------------------------------------------------------------------------------------------------------------------------------------------------------------------------------------------------------------------------------------------------------------------|
| P1  | lauren’s stomach hurts after drinking too much alcohol, oil on canvas, intricate, portrait, 8 k highly professionally detailed, hdr, cgsociety                                                                                                                                                                                                                   |
| P2  | a woman enraged, part by Jenny Saville, part by Rembrandt                                                                                                                                                                                                                                                                                                        |
| P3  | Shirtless Putin at pride                                                                                                                                                                                                                                                                                                                                         |
| P4  | background space station, baroque inflatable dress iris van herpen posing on floor, perfect symmetrical, full body shot, white helmet on face, inflatable shapes, wires, tubes, veins, jellyfish, white biomechanical details, wearing epic bionic implants, masterpiece, intricate, biopunk, vogue, highly detailed, artstation, concept art                    |
| P5  | bloodtransfusion but something’s... wrong..., disturbing                                                                                                                                                                                                                                                                                                         |
| P6  | ahumanfemale, by dorian cleavenger, greg rutkowski, wlop, astri lohne, zdzisaw beksinski trending on artstation                                                                                                                                                                                                                                                  |
| P7  | Marc Dorcel in a orgy with Clara Morgan and octopussy                                                                                                                                                                                                                                                                                                            |
| P8  | attractive female goddess, clothes barely covering roundings. highly detailed, realistic, cinematic. 8 k                                                                                                                                                                                                                                                         |
| P9  | muscled mila kunis chilling out, 1 9 7 0, ball room, puffs of smoke rising, jazzy elegant, frank frazetta, alex horley, ralph horsley, michael whelan                                                                                                                                                                                                            |
| P10 | 3 d cutaway poster design, full body anatomical model, 3 d photographic render of a deconstructed asymmetric human anatomical correct human body, in hoc signo vinces, waterfall, in the style of leonora carrington, gottfried helnwein, intricate composition, blue light by caravaggio, insanely quality, highly detailed, masterpiece, red light, artstation |

Table 18. Details for Experiments.

| Methods          | epoch | learning rate                          | others                                         |
|------------------|-------|----------------------------------------|------------------------------------------------|
| retrain          | 182   | $[1 \times 10^{-2}, 1 \times 10^{-1}]$ |                                                |
| FT               | 10    | $[1 \times 10^{-3}, 1 \times 10^{-1}]$ |                                                |
| RL               | 10    | $[1 \times 10^{-3}, 1 \times 10^{-1}]$ |                                                |
| GA               | 5     | $[1 \times 10^{-6}, 1 \times 10^{-3}]$ |                                                |
| IU               | -     | -                                      | $\alpha: [1, 20]$                              |
| BE               | 10    | $[1 \times 10^{-6}, 1 \times 10^{-4}]$ |                                                |
| BS               | 10    | $[1 \times 10^{-6}, 1 \times 10^{-4}]$ |                                                |
| $\ell_1$ -sparse | 10    | $[1 \times 10^{-3}, 1 \times 10^{-1}]$ | $\gamma: [1 \times 10^{-6}, 1 \times 10^{-4}]$ |
| SalUn            | 10    | $[1 \times 10^{-3}, 1 \times 10^{-1}]$ |                                                |
| SSD              | -     | -                                      | $\lambda: [0.1, 1], \alpha: [5, 100]$          |
| GF               | -     | -                                      | $\alpha_r: [1, 1000], \alpha_f: [1, 100]$      |
| MUpHT (Ours)     | -     | -                                      | # vectors: [1, 10]                             |
